# Supplementary material for: Assessment of severe aerosol events from NASA MODIS and VIIRS aerosol products for data assimilation and climate continuity
Source: Copernicus journal article supplement (doi:10.5194/amt-16-2547-2023), 2023-05-26
Supplement: Supplementary file 4 [file amt-16-2547-2023-supplement.zip]

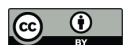

## *Supplement of*

# **Assessment of severe aerosol events from NASA MODIS and VIIRS aerosol products for data assimilation and climate continuity**

**Amanda Gumber et al.**

*Correspondence to:* Amanda Gumber ([amanda.gumber@ssec.wisc.edu](mailto:amanda.gumber@ssec.wisc.edu))

- [amt-16-2547-2023-supplement-title-page.pdf](#)
- [figS01.pdf](#)
- [figS02.pdf](#)
- [figS03.pdf](#)
- [figS04.pdf](#)
- [figS05.pdf](#)
- [figS06.pdf](#)
- [figS07.pdf](#)
- [figS08.pdf](#)
- [figS09.pdf](#)

The copyright of individual parts of the supplement might differ from the article licence.
