# Supplementary material for: Assessment of severe aerosol events from NASA MODIS and VIIRS aerosol products for data assimilation and climate continuity
Source: Copernicus journal article supplement (doi:10.5194/amt-16-2547-2023), 2023-05-26
Supplement: Supplementary file 9 [file amt-16-2547-2023-supplement.zip]

# Saharan Africa

AERONET vs DT/DB

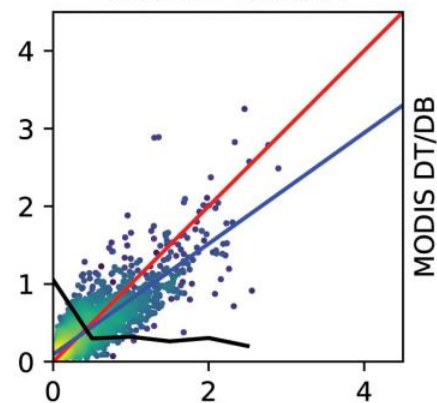

DT/DB vs MAIAC

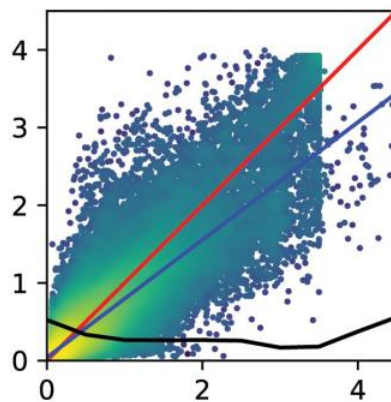

AERONET vs MAIAC

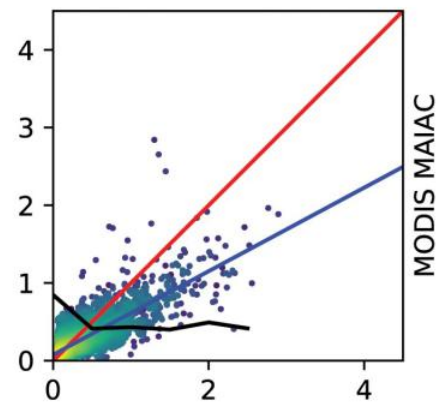

MAIAC vs VIIRS

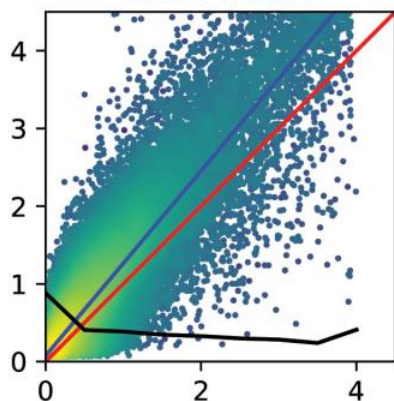

DT/DB vs VIIRS

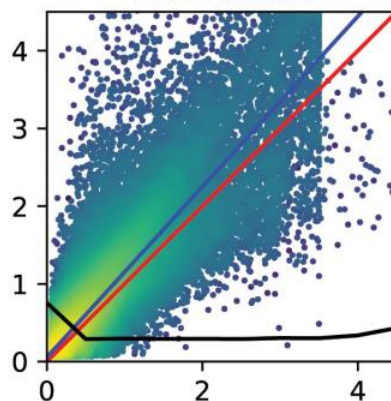

AERONET vs VIIRS

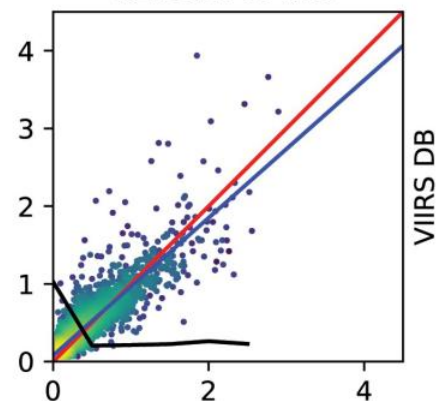

MODIS MAIAC

MODIS DT/DB

AERONET
