# Supplementary figures and images for: Assessment of severe aerosol events from NASA MODIS and VIIRS aerosol products for data assimilation and climate continuity
Source: Copernicus journal article supplement (doi:10.5194/amt-16-2547-2023), 2023-05-26

# Southwest Asia

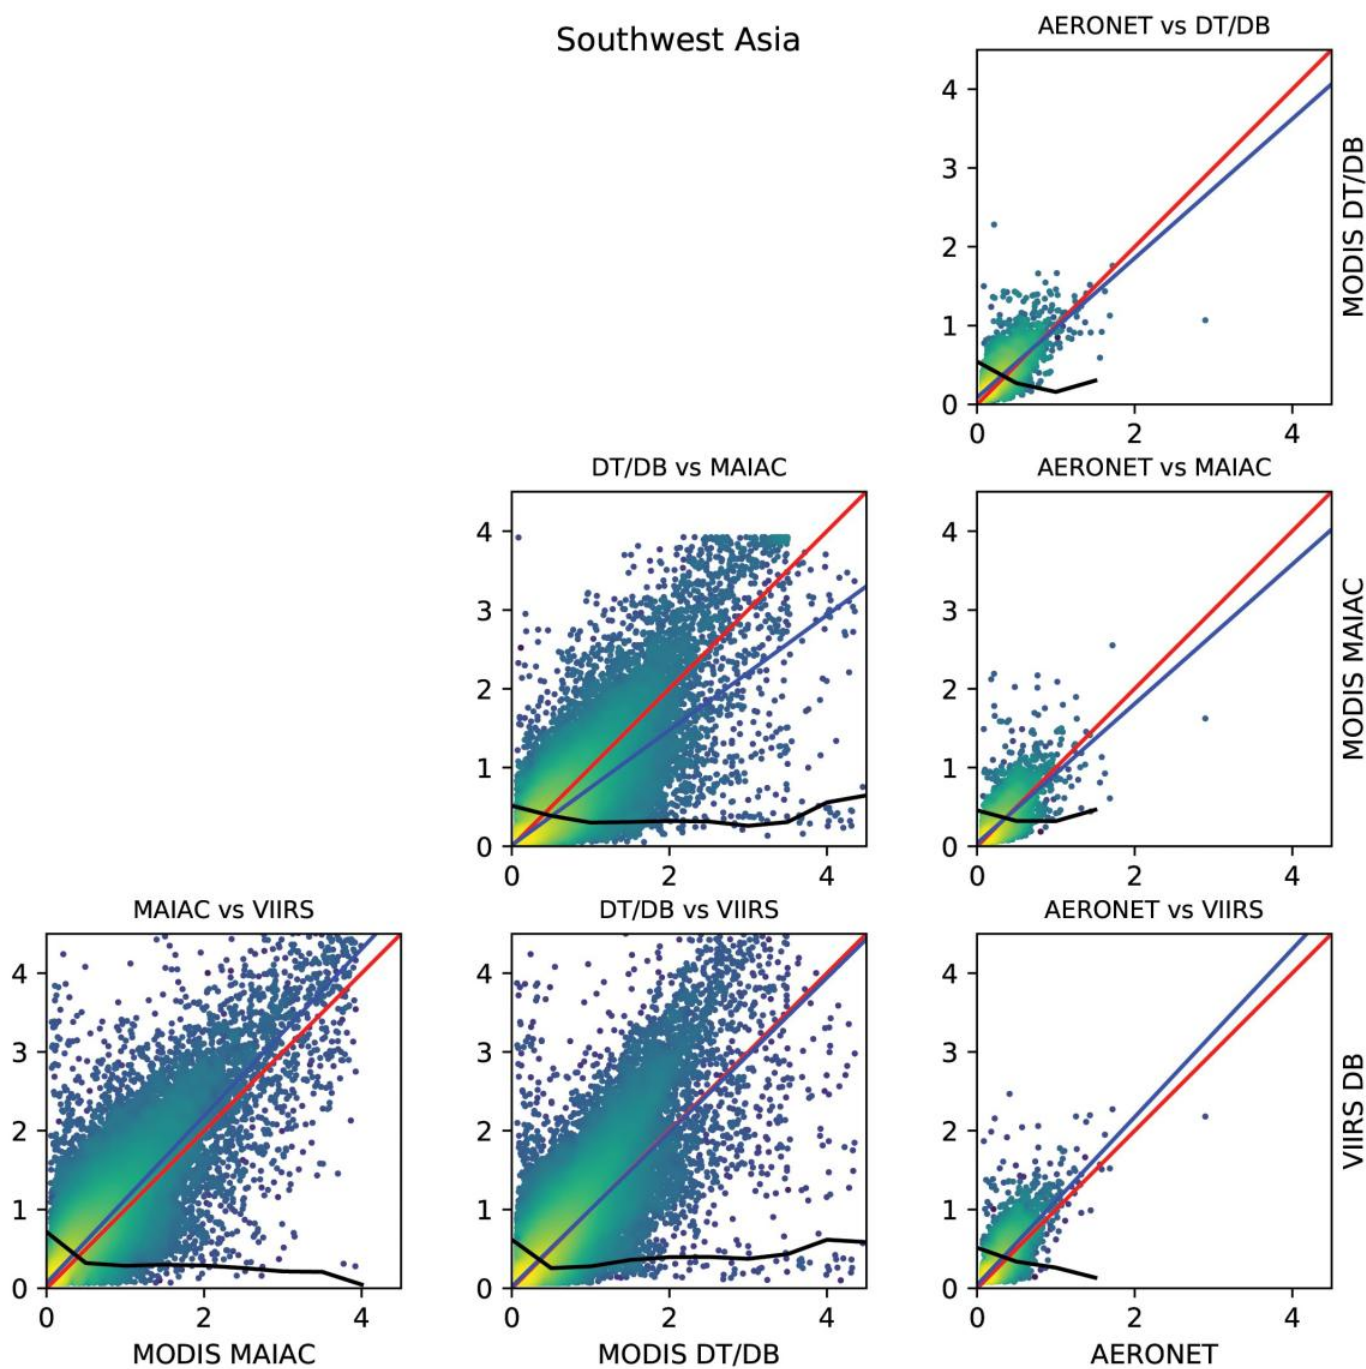

Supplement: Supplementary file 1 [file amt-16-2547-2023-supplement.zip]

# South America

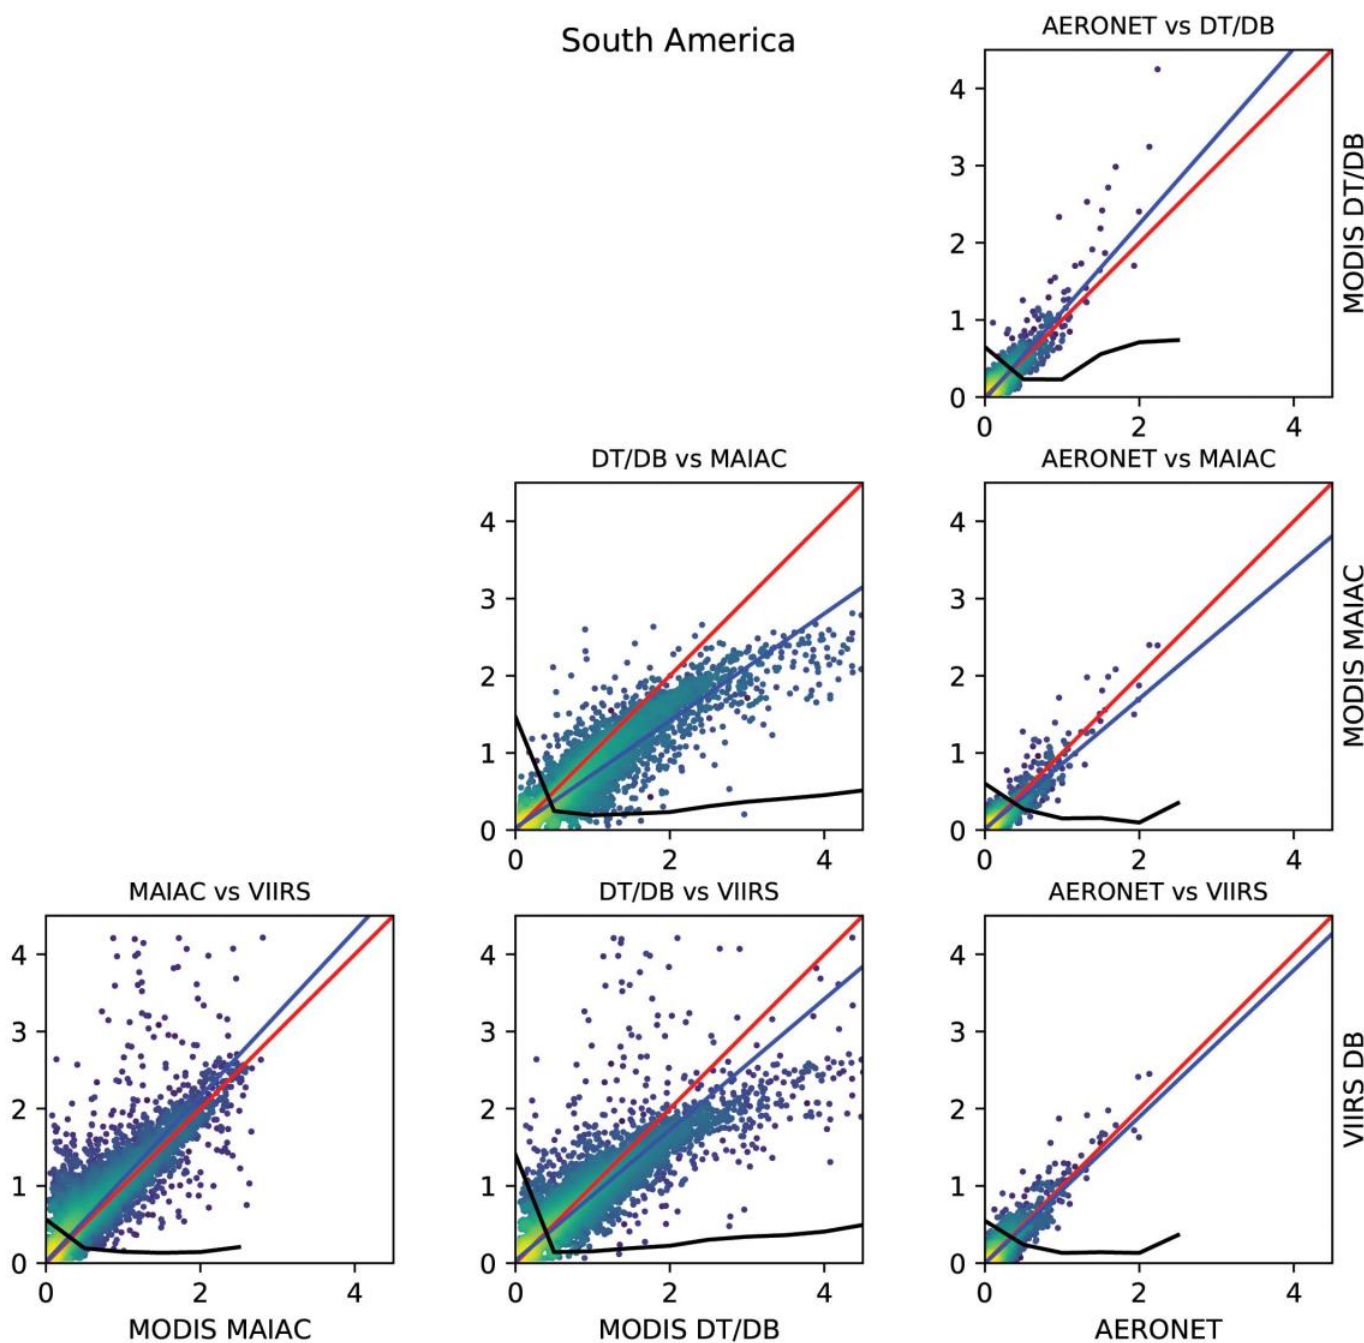

Supplement: Supplementary file 2 [file amt-16-2547-2023-supplement.zip]

# Southeast Asia

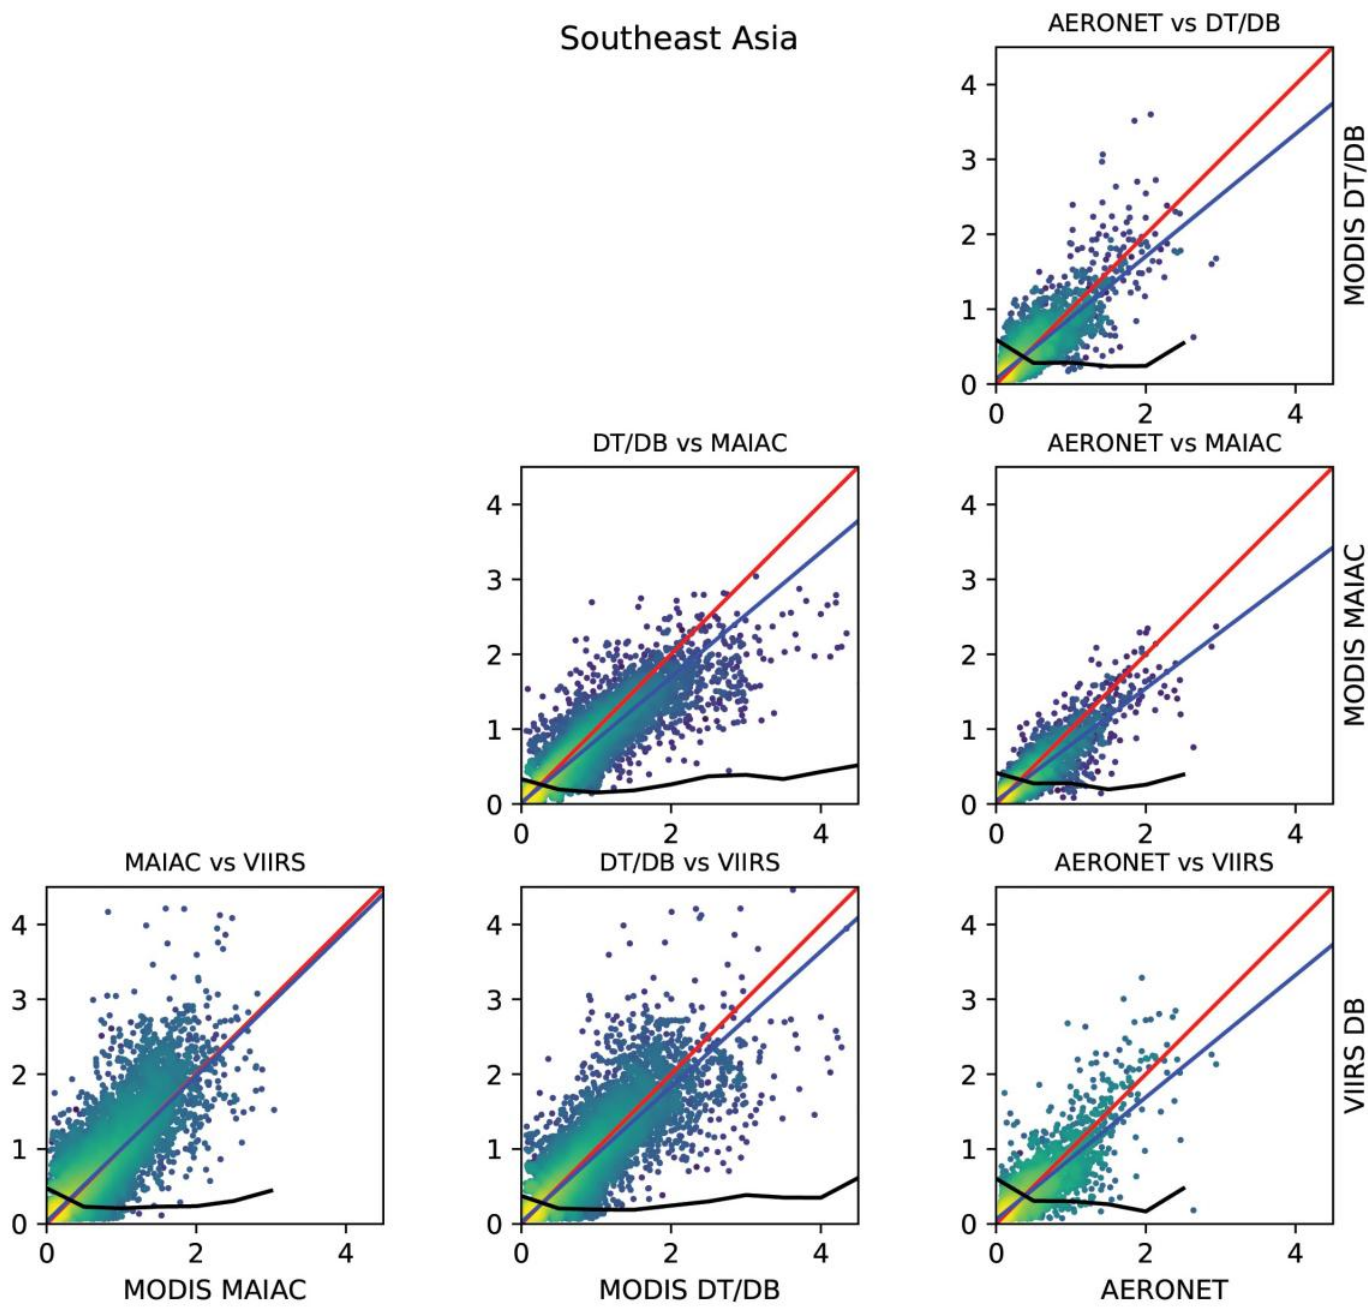

Supplement: Supplementary file 3 [file amt-16-2547-2023-supplement.zip]

## Eastern Asia

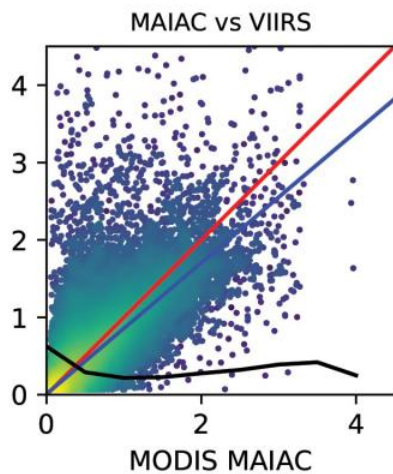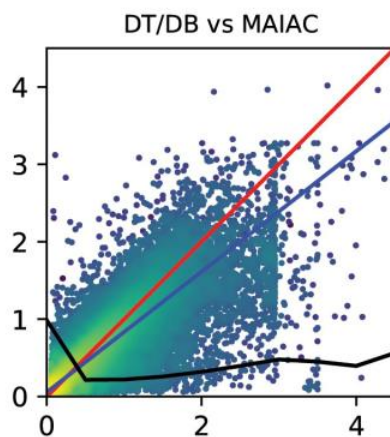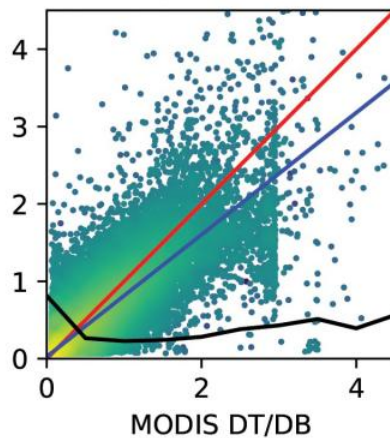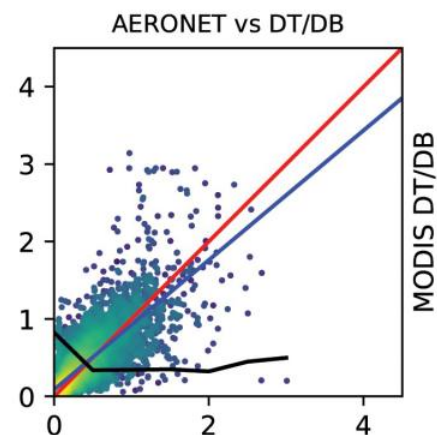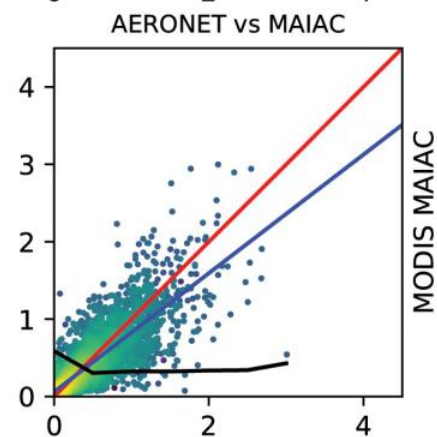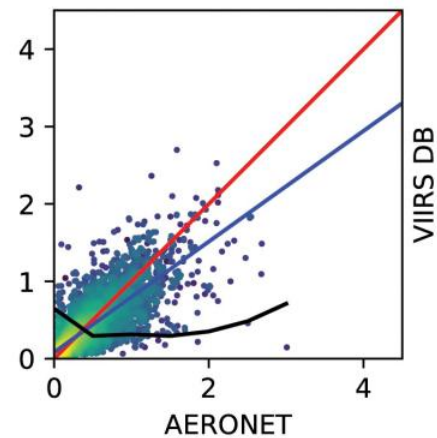

Supplement: Supplementary file 5 [file amt-16-2547-2023-supplement.zip]

# Boreal Canada

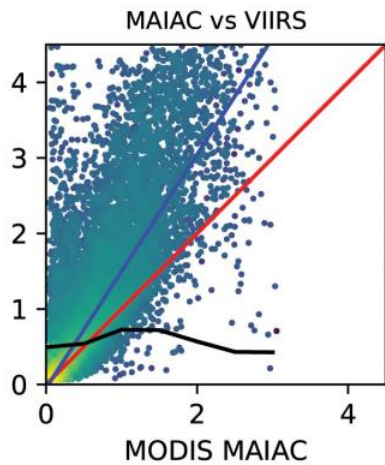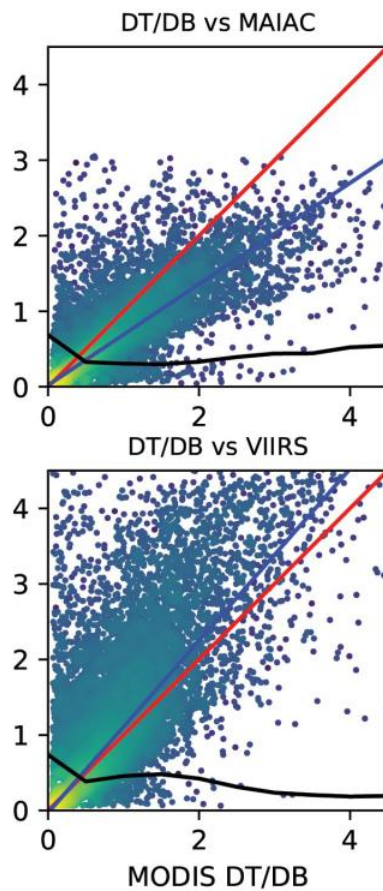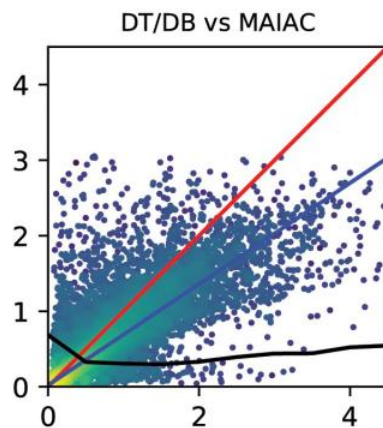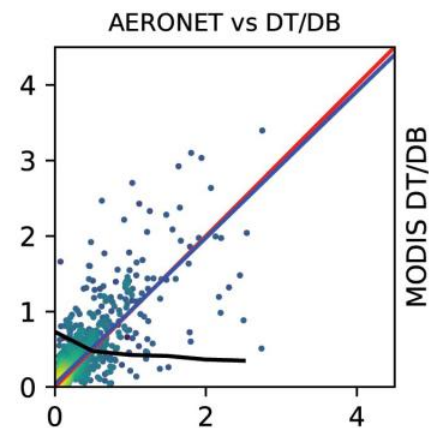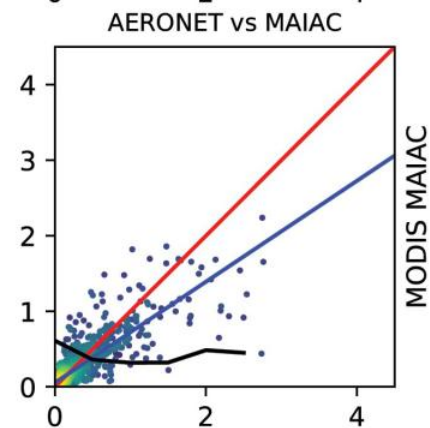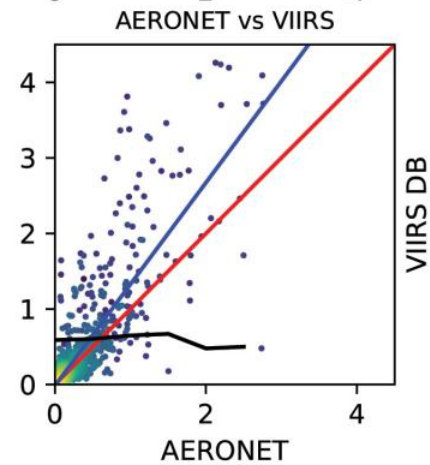

Supplement: Supplementary file 6 [file amt-16-2547-2023-supplement.zip]

# Central Africa

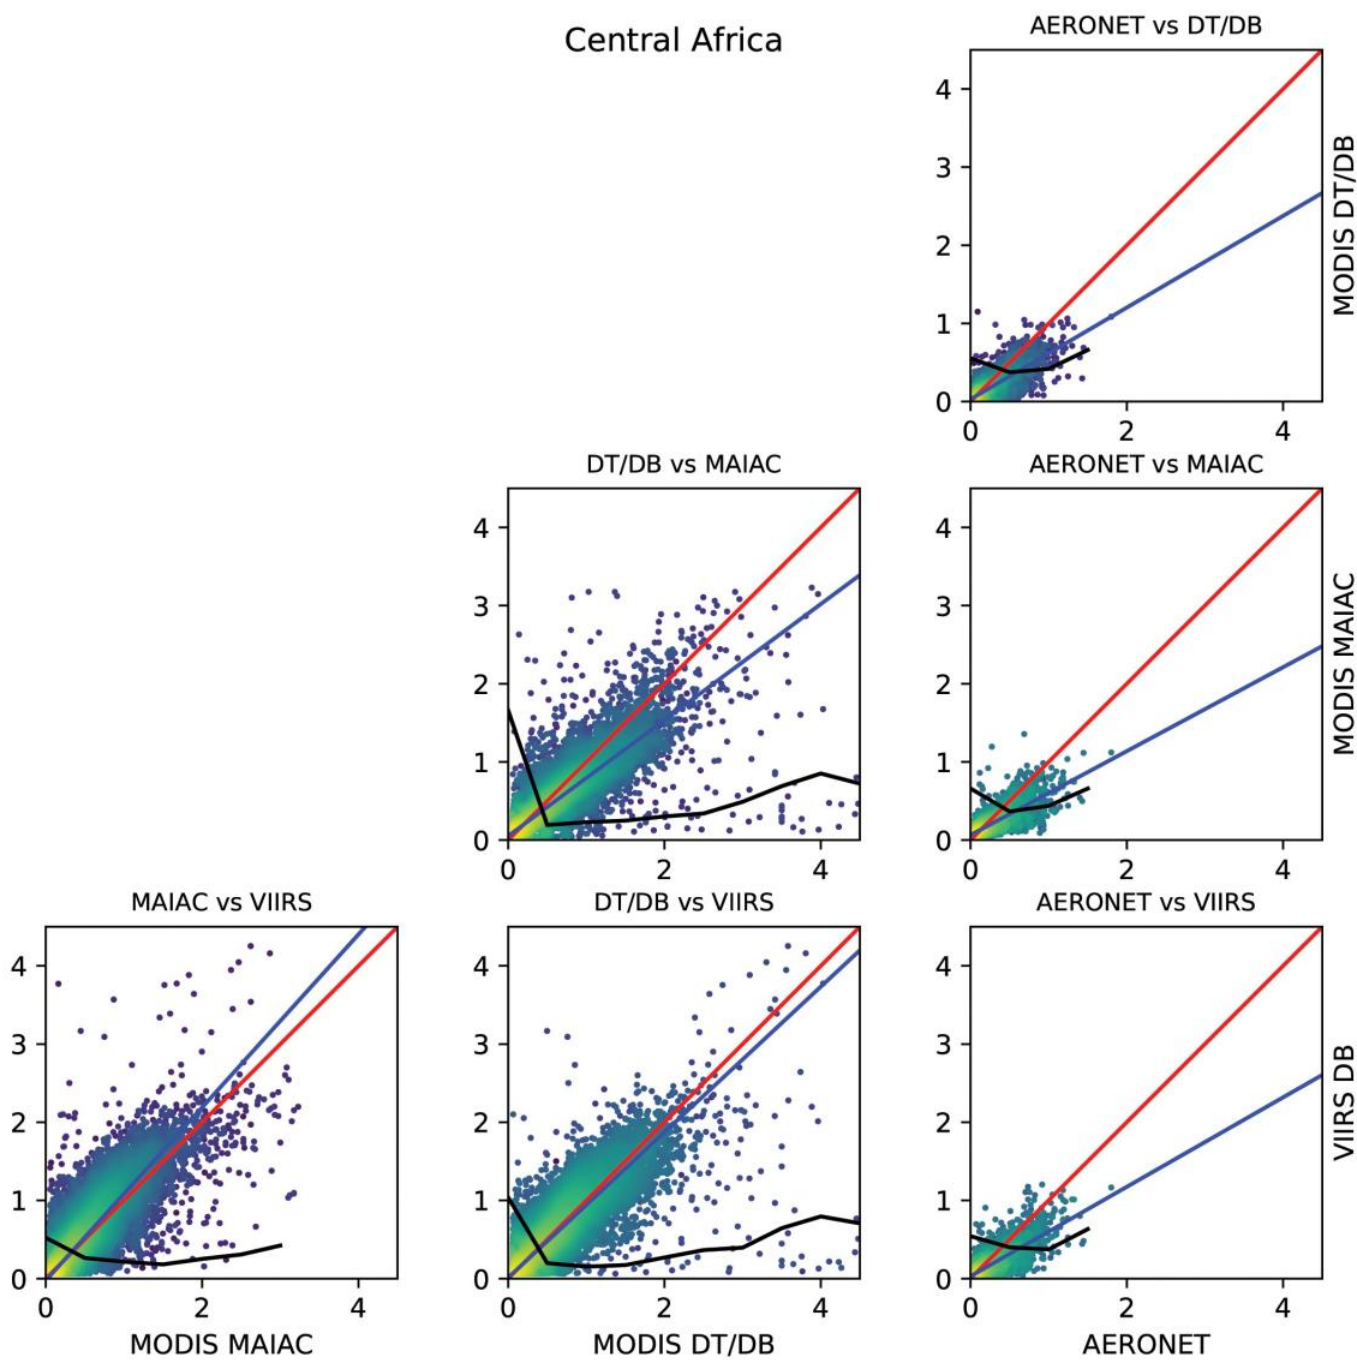

Supplement: Supplementary file 10 [file amt-16-2547-2023-supplement.zip]
